# Supplementary material for: Engineering a hypoxia-tolerant Saccharomyces cerevisiae for rapid ethanol production via co-utilization of glucose and acetic acid and redox-enhanced flocculation
Source: Royal Society of Chemistry journal article supplement (doi:10.1039/d5se00258c), 2025-01-01
Supplement: d5se00258c2.xlsx [file d5se00258c2.xlsx]

## Sheet: Table S3
	Table S3A. One-way ANOVA statistical analysis of fermentation characteristics for recombinant strains used in this study (C1-C5 and E1-E5) at P level < 0.05.
	Time (h)	S.O.V.*	d.f.**	Residual glucose		Acetic acid concentration		Glycerol concentration		Ethanol concentration		Cell growth (OD)
				Ms***	P value	Ms	P value	Ms	P value	Ms	P value	Ms	P value
	0	Line	9	0.875	0.49	0.42	0.157	-	-	-	-	0.00059	0.9943
		Error	20	0.898		0.0249		-		-		0.00333333
	15	Line	9	854.502	0.0001	0.866	0.0001	0.172	0.0001	170.8	0.0001	5.1	0.0002
		Error	20	7.05		0.0426		0.0006		0.943		0.729
	18	Line	9	1718.8	0.0001	0.904	0.0001	0.208	0.0001	414.8	0.0001	5.25	0.0001
		Error	20	4.82		0.051		0.0004		0.896		0.081
	24	Line	9	2124.3	0.0001	1.02	0.0001	0.263	0.0001	588.5	0.0001	2.42	0.0001
		Error	20	2.486		0.053		0.0004		2.239		0.247
	30	Line	9	1667.1	0.0001	1.19	0.001	0.292	0.0001	444.9	0.0001	1.6	0.0001
		Error	20	8.66		0.062		0.001		1.58		0.182
	48	Line	9	947.7	0.0001	1.488	0.0001	0.295	0.0001	262.6	0.0001	1.56	0.0009
		Error	20	6.77		0.072		0.001		2.08		0.293
	72	Line	9	185.1	0.0001	1.69	0.0001	0.282	0.0001	59.1	0.0001	1.43	0.0002
		Error	20	15.6		0.056		0.002		4.22		0.21
	*S.O.V. indicates the source of varience.**d.f. indicates dependent variable.*** Ms indicates the mean square for line and error at (P < 0.05).
	Table S3B. Means, SDs, and Duncan's Multiple Range Test of fermentation characteristics for recombinant strains used in this study (C1-C5 and E1-E5) at P level < 0.05 at 24 h.
	Strain name	Residual glucose	Acetic acid concentration	Glycerol concentration	Ethanol concentration	Cell growth (OD)
	C1	52.77 ±1.93 CD*	4.49 ± 0.38 A	0.99 ± 0.01 A	19.60 ± 0.18 B	8.40 ± 0.40 BC
	C2	62.72 ± 1.30 B	4.57 ± 0.38 A	0.19 ± 0.01 FG	15.60 ± 0.22 C	8.26 ± 0.23 BC
	C3	69.63 ± 1.07 A	3.85 ± 0.11 B	0.13 ± 0.01 G	12.70 ± 0.60 D	7.87 ± 0.23 C
	C4	69.76 ± 2.17 A	3.89 ± 0.23 B	0.26 ± 0.01 E	13.60 ± 0.44 CD	8.13 ± 0.23 BC
	C5	53.59 ± 0.63 C	3.75 ± 0.18 B	0.46 ± 0.02 D	21.2 ± 0.07 B	8.60 ± 0.20 BC
	E1	50.64 ± 1.45 D	4.61 ± 0.09 A	0.80 ± 0.02 B	22.7 ± 0.30 B	9.00 ± 0.72 B
	E2	53.82 ± 2.29 C	4.39 ± 0.14 A	0.19 ± 0.01 F	21.90 ± 0.70 B	8.73 ± 0.94 BC
	E3	70.66 ± 0.95 A	3.76 ± 0.32 B	0.16 ± 0.01 G	13.10 ± 0.02 D	9.00 ± 0.72 B
	E4	0.00 ± 0.00 E	2.95 ± 0.10 C	0.50 ± 0.01 D	50.00 ± 0.50 A	10.20 ± 0.35 A
	E5	0.00 ± 0.00 E	3.13 ± 0.10 C	0.54 ± 0.04 C	49.80 ± 0.34 A	10.67 ± 0.23 A
	*Statistical analysis indicated that means sharing the same letters (A, B, C, D, F, G) are not significantly different in Duncan's Multiple Range Test.
