# Supplementary material for: Engineering a hypoxia-tolerant Saccharomyces cerevisiae for rapid ethanol production via co-utilization of glucose and acetic acid and redox-enhanced flocculation
Source: Royal Society of Chemistry journal article supplement (doi:10.1039/d5se00258c), 2025-01-01
Supplement: d5se00258c3.xlsx [file d5se00258c3.xlsx]

## Sheet: Table S4
	Table S4A. One-way ANOVA statistical analysis of fermentation characteristics for recombinant strain E5 at different aeration levels at P level < 0.05.
	Time (h)	S.O.V.*	d.f.**	Residual glucose		Acetic acid concentration		Glycerol concentration		Ethanol concentration
				Ms***	P value	Ms	P value	Ms	P value	Ms	P value
	0	Line	3	4.52	0.0072	0.0037	0.6274	-	-	-	-
		Error	8	0.533		0.0062		-		-
	15	Line	3	85.05	0.0001	0.1559	0.0001	0.347	0.0001	36.73	0.0001
		Error	8	0.42		0.005		0.0008		0.626
	18	Line	3	202.8	0.0001	0.0967	0.0004	0.464	0.0001	84.06	0.0001
		Error	8	0.866		0.0045		0.0013		0.962
	21	Line	3	75.27	0.0001	0.1019	0.0006	0.501	0.0001	87.7	0.0001
		Error	8	0.337		0.006		0.0009		0.42
	24	Line	3	9.47	0.0001	0.0414	0.0106	0.51	0.0001	17.49	0.0001
		Error	8	0.083		0.00557		0.001		0.29
	*S.O.V. indicates the source of varience.**d.f. indicates dependent variable.*** Ms indicates the mean square for line and error at (P < 0.05).
	Table S4B. Means, SDs, and Duncan's Multiple Range Test of fermentation characteristics for recombinant strain E5 at different aeration levels at P level < 0.05 at 24 h.
	Strain name	Residual glucose	Acetic acid concentration	Glycerol concentration	Ethanol concentration
	E5-10mL*	3.55 ± 0.58 A**	2.93 ± 0.06 B	0.64 ± 0.05 B	44.05 ± 0.42 C
	E5-30 mL	0.00 ± 0.00 B	2.97 ± 0.07 B	0.47 ± 0.03 C	47.28 ± 0.70 B
	E5-50 mL	0.00 ± 0.00 B	2.95 ± 0.11 B	0.54 ± 0.02 C	49.83 ± 0.59 A
	E5-70 mL	0.00 ± 0.00 B	3.89 ± 0.23 A	1.36 ± 0.05 A	48.04 ± 0.41 B
	* Culture volume in the fermentation flasks (10mL culture volume / 100 mL Erlenmyer flask) .**Statistical analysis indicated that means sharing the same letters (A, B, C) are not significantly different in Duncan's Multiple Range Test.
