# Supplementary material for: Engineering a hypoxia-tolerant Saccharomyces cerevisiae for rapid ethanol production via co-utilization of glucose and acetic acid and redox-enhanced flocculation
Source: Royal Society of Chemistry journal article supplement (doi:10.1039/d5se00258c), 2025-01-01
Supplement: d5se00258c4.xlsx [file d5se00258c4.xlsx]

## Sheet: Table S5
	Table S4A. One-way ANOVA statistical analysis of fermentation characteristics for recombinant strain E4 at different aeration levels at P level < 0.05.
	Time (h)	S.O.V.*	d.f.**	Residual glucose		Acetic acid concentration		Glycerol concentration		Ethanol concentration
				Ms***	P value	Ms	P value	Ms	P value	Ms	P value
	0	Line	3	-	-	0.0008	0.6932	-	-	-	-
		Error	8	0.333		0.0016		-		-
	15	Line	3	1.912	0.0692	0.027	0.001	0.033	0.0001	0.77	0.05
		Error	8	0.545		0.0016		0.0001		0.039
	18	Line	3	6.68	0.01	0.037	0.0005	0.048	0.0001	0.078	0.05
		Error	8	0.99		0.001		0.0001		0.0515
	21	Line	3	7.66	0.01	0.04	0.0001	0.048	0.0001	0.848	0.05
		Error	8	1.03		0.0008		0.0003		0.086
	24	Line	3	7.33	0.0012	0.091	0.0032	0.064	0.0001	0.677	0.05
		Error	8	0.484		0.008		0.0003		0.086
	27	Line	3	-	-	0.141	0.0001	0.067	0.0001	6.19	0.0021
		Error	8	-		0.0004		0.0003		0.484
	*S.O.V. indicates the source of varience.**d.f. indicates dependent variable.*** Ms indicates the mean square for line and error at (P < 0.05).
	Table S4B. Means, SDs, and Duncan's Multiple Range Test of fermentation characteristics for recombinant strain E4 at different aeration levels at P level < 0.05 at 24 h.
	Strain name	Residual glucose	Acetic acid concentration	Glycerol concentration	Ethanol concentration
	E5-10mL*	3.89 ± 0.66 B**	3.46 ± 0.06 A	0.33 ± 0.03 B	45.88 ± 0.79 A
	E5-30 mL	2.85 ± 0.58 B	3.07 ± 0.17 C	0.24 ± 0.01 C	46.70 ± 1.04 A
	E5-50 mL	3.84 ± 0.60 B	3.21 ± 0.05 BC	0.30 ± 0.01 B	46.90 ± 1.17 A
	E5-70 mL	6.51 ± 0.89 A	3.38 ± 0.04 AB	0.57 ± 0.02 A	46.83 ± 0.60 A
	*Culture volume in the fermentation flasks (10mL culture volume / 100 mL Erlenmyer flask) .**Statistical analysis indicated that means sharing the same letters (A, B, C) are not significantly different in Duncan's Multiple Range Test.
